# Supplementary material
Source: HighWire-hosted journal article supplement (https://bibliotheek.ehb.be/content/suppl/2024/06/10/svn-2023-003048)
Supplement: svn-2023-003048supp002_data_supplement.pdf [file svn-2023-003048supp002_data_supplement.pdf]

Online-Only Supplements list

**Table S1.** Number of patients with adverse events (by system organ class) up to 90 days visit

**Table S2.** Number of patients with serious adverse events (by system organ class) up to 90 days visit

**Table S3.** Result of quality indicators tested between rhTNK-tPA and Melalyse

Table S1. Number of patients with adverse events (by system organ class) up to 90 days visit

| System organ class                                                  | Tenecteplase (N=76) | Alteplase (N=61) | P value |
|---------------------------------------------------------------------|---------------------|------------------|---------|
| Overall                                                             | 70 (92.1%)          | 56 (91.8%)       | >0.99   |
| Metabolism and nutrition disorders                                  | 39 (51.3%)          | 31 (50.8%)       | 0.95    |
| Ear and labyrinth disorders                                         | 0                   | 0                | ..      |
| Hepatobiliary disorders                                             | 4 (5.3%)            | 4 (6.6%)         | >0.99   |
| Infections and infestations                                         | 23 (30.3%)          | 20 (32.8%)       | 0.75    |
| Investigations                                                      | 19 (25.0%)          | 24 (39.3%)       | 0.07    |
| Nervous system disorders                                            | 23 (30.3%)          | 13 (21.3%)       | 0.24    |
| Injury, poisoning and procedural complications                      | 5 (6.6%)            | 5 (8.2%)         | 0.98    |
| Musculoskeletal and connective tissue disorders                     | 2 (2.6%)            | 6 (9.8%)         | 0.14    |
| Surgical and medical procedures                                     | 1 (1.3%)            | 0                | >0.99   |
| Congenital, familial and genetic disorders                          | 0                   | 1 (1.6%)         | 0.45    |
| Respiratory, thoracic and mediastinal disorders                     | 16 (21.1%)          | 18 (29.5%)       | 0.25    |
| Psychiatric disorders                                               | 13 (17.1%)          | 9 (14.8%)        | 0.71    |
| Neoplasms benign, malignant and unspecified (incl cysts and polyps) | 0                   | 1 (1.6%)         | 0.45    |
| Immune system disorders                                             | 0                   | 1 (1.6%)         | 0.45    |
| Endocrine disorders                                                 | 1 (1.3%)            | 0                | >0.99   |

| System organ class                                   | Tenecteplase (N=76) | Alteplase (N=61) | P value |
|------------------------------------------------------|---------------------|------------------|---------|
| Skin and subcutaneous tissue disorders               | 6 (7.9%)            | 4 (6.6%)         | >0.99   |
| General disorders and administration site conditions | 10 (13.2%)          | 5 (8.2%)         | 0.36    |
| Social circumstances                                 | 0                   | 0                | ..      |
| Renal and urinary disorders                          | 15 (19.7%)          | 8 (13.1%)        | 0.30    |
| Reproductive system and breast disorders             | 0                   | 1 (1.6%)         | 0.45    |
| Gastrointestinal disorders                           | 35 (46.1%)          | 32 (52.5%)       | 0.46    |
| Cardiac disorders                                    | 10 (13.2%)          | 15 (24.6%)       | 0.09    |
| Vascular disorders                                   | 7 (9.2%)            | 9 (14.8%)        | 0.32    |
| Blood and lymphatic system disorders                 | 16 (21.1%)          | 7 (11.5%)        | 0.14    |
| Eye disorders                                        | 0                   | 1 (1.6%)         | 0.45    |

Table S2. Number of patients with serious adverse events (by system organ class) up to 90 days visit

| System organ class                                                  | Tenecteplase (N=76) | Alteplase (N=61) | P value |
|---------------------------------------------------------------------|---------------------|------------------|---------|
| Overall                                                             | 15 (19.7%)          | 16 (26.2%)       | 0.37    |
| Metabolism and nutrition disorders                                  | 0                   | 0                | ..      |
| Ear and labyrinth disorders                                         | 0                   | 0                | ..      |
| Infections and infestations                                         | 2 (2.6%)            | 2 (3.3%)         | >0.99   |
| Investigations                                                      | 0                   | 1 (1.6%)         | 0.45    |
| Nervous system disorders                                            | 6 (7.9%)            | 9 (14.8%)        | 0.20    |
| Injury, poisoning and procedural complications                      | 4 (5.3%)            | 3 (4.9%)         | >0.99   |
| Musculoskeletal and connective tissue disorders                     | 0                   | 1 (1.6%)         | 0.45    |
| Congenital, familial and genetic disorders                          | 0                   | 0                | ..      |
| Respiratory, thoracic and mediastinal disorders                     | 3 (4.0%)            | 1 (1.6%)         | 0.63    |
| Neoplasms benign, malignant and unspecified (incl cysts and polyps) | 0                   | 0                | ..      |
| General disorders and administration site conditions                | 2 (2.6%)            | 0                | 0.50    |
| Renal and urinary disorders                                         | 0                   | 1 (1.6%)         | 0.45    |
| Gastrointestinal disorders                                          | 1 (1.3%)            | 0                | >0.99   |
| Cardiac disorders                                                   | 3 (4.0%)            | 3 (4.9%)         | >0.99   |
| Vascular disorders                                                  | 0                   | 0                | ..      |
| Eye disorders                                                       | 0                   | 0                | ..      |

Table S3. Result of quality indicators tested between rhTNK-tPA\* and Metalyse

| Item                                 | Specification       | rhTNK-tPA2017110402 | rhTNK-tPA2018120102 | rhTNK-tPA201905012 | Metalyse 804823     | Metalyse 902235     |
|--------------------------------------|---------------------|---------------------|---------------------|--------------------|---------------------|---------------------|
| Potency†                             | Indicated amount%   | 91                  | 95                  | 97                 | 106                 | 101                 |
| Protein content†                     | Indicated amount%   | 101                 | 99                  | 101                | 100                 | 96                  |
| Purity (electrophoresis)             | Monomer content%    | 95.6                | 96.0                | 95.7               | ...‡                |                     |
|                                      | Monomer content%    | 98.4                | 98.2                | 98.5               | 98.4                | 99.0                |
| Purity (HPLC)                        | Aggregates content% | 1.5                 | 1.6                 | 1.3                | 0.9                 | 0.6                 |
|                                      | Two-chain content%  | 4.6                 | 8.8                 | 6.5                | 41.6                | 34.5                |
| Molecular size                       | KD Single-chain     | 69.2                | 68.6                | 67.9               | 68.2                | 70.7                |
|                                      | KD Two-chain        | 35.4                | 33.8                | 33.5               | 32.2                | 33.7                |
| Type I/ Type II content (home made)  | Type I%             | 29.0                | 29.6                | 30.3               | 29.1                | 29.4                |
|                                      | Type II%            | 71.0                | 70.4                | 69.7               | 70.9                | 70.6                |
| Type I/ Type II content (commercial) | Type I%             | 40.9                | 41.0                | 41.2               | 44.1                | 42.2                |
|                                      | Type II%            | 59.1                | 59.0                | 58.8               | 55.9                | 57.8                |
| Isoelectric point                    | /                   | 5.9-6.9             | 5.8-6.9             | 6.0-6.9            | 5.8-7.0             | 5.9-7.0             |
| Tryptic-peptide HapMap               | /                   | Met specification   | Met specification   | Met specification  | Same with rhTNK-tPA | Same with rhTNK-tPA |
| PeptideHapMap                        | /                   | Met specification   | Met specification   | Met specification  | Same with rhTNK-tPA | Same with rhTNK-tPA |
| Sialic acid                          | %                   | 98                  | 105                 | 100                | 82                  | 91                  |

The result was tested in China Shijiazhuang Pharmaceutical Company Recomgen Pharmaceutical (Guangzhou). Abbreviations: rhTNK-tPA=recombinant human TNK tissue-type plasminogen activator. HPLC= high performance liquid chromatography.

\*rhTNK-tPA: the product name of the Chinese version of tenecteplase. †The results of potency and protein content were tested in comparison to pharmacopoeia standards.

‡The Metalyse Hapmap has fragment stripe besides monomer and aggregates, which interfered with the result of purity.
